# Supplementary material
Source: PubMed Central journal article supplement (PMC4287831)
Supplement: ac503651e_si_001.pdf [file ac503651e_si_001.pdf]

## Supplemental Information

# Expanding the Limits of Human Blood Metabolite Quantitation using NMR Spectroscopy

G. A. Nagana Gowda,<sup>1\*</sup> Yashas N. Gowda<sup>1</sup> and Daniel Raftery<sup>1,2,3\*</sup>

<sup>1</sup>*Northwest Metabolomics Research Center, Anesthesiology and Pain Medicine, and*

<sup>2</sup>*Department of Chemistry, University of Washington, Seattle, WA 98109, <sup>3</sup>Fred Hutchinson Cancer Research Center, Seattle, WA 98109*

This file contains 10 pages 1 to 10. The first page is the Title page; page 2 contains Table S1; page 3 contains Table S2 and Table S3; pages 4 and 5 contain Table S4; pages 6 and 7 contains Table S5; and pages 8, 9 and 10 contain Supplemental Figures S1, S2 and S3, respectively.

**Table S1:** List of metabolites used for spiking experiments to confirm their presence in the pooled human serum NMR spectra.

| <b>Metabolites confirmed to be present in serum</b>              | <b>Metabolites not confirmed to be present in serum</b> |
|------------------------------------------------------------------|---------------------------------------------------------|
| 1. 1-Methylhistidine                                             | 36. Cis-Aconitic acid                                   |
| 2. 3-Methylhistidine                                             | 37. Acetoacetic acid                                    |
| 3. 4-Methyl-2-oxovaleric acid<br>(2-Oxoisocaproic acid)          | 38. Pyruvic acid                                        |
| 4. 3-Methyl-2-oxobutanoic acid<br>(2-Oxoisovaleric acid)         | 39. Pyridoxine                                          |
| 5. 2-Hydroxybutyric acid                                         | 40. 2-Hydroxyisocaproic acid                            |
| 6. D-(+)-Mannose                                                 | 41. Malonic acid                                        |
| 7. Hypoxanthine                                                  | 42. 1-Methylguanidine                                   |
| 8. Sarcosine                                                     | 43. Citrulline                                          |
| 9. Pyroglutamic acid                                             | 44. Acetamide                                           |
| 10. DL-Ornithine                                                 | 45. Trimethyl Amine N-oxide                             |
| 11. N,N-Dimethylglycine                                          | 46. D-(-)-Fructose                                      |
| 12. 2-Hydroxy-3-methylbutyric acid<br>(2-hydroxyisovaleric acid) | 47. Gamma-aminobutyric acid                             |
| 13. Arginine                                                     | 48. Isocaproic acid                                     |
| 14. Succinic acid                                                | 49. 2-Ketoglutaric acid                                 |
| 15. Betaine                                                      | 50. 2-Methylbutyric acid                                |
| 16. Carnitine                                                    | 51. Methylmalonic acid                                  |
| 17. Fumaric acid                                                 | 52. D-Glucose-6-phosphate                               |
| 18. Serine                                                       | 53. L-Cystine                                           |
| 19. N-Acetyl glycine                                             | 54. Adipic acid                                         |
| 20. Isobutyric acid                                              | 55. 2-Methylglutaric acid                               |
| 21. 3-Hydroxyisovaleric acid                                     | 56. Monomethylsuccinic acid                             |
| 22. Xanthine                                                     | 57. Propionic acid                                      |
| 23. Hippuric acid                                                | 58. Oxaloacetic acid                                    |
| 24. Myo-Inositol                                                 | 59. Allantoin                                           |
| 25. Sucrose                                                      | 60. 4-Pyridoxic acid                                    |
| 26. O-Acetylcarnitine                                            | 61. L-Ascorbic acid                                     |
| 27. 2-Aminobutyric acid                                          | 62. L-Cysteine                                          |
| 28. L-Methionine                                                 | 63. Suberic acid                                        |
| 29. Isovaleric acid                                              | 64. 3-Methylbutyric acid                                |
| 30. Acetone                                                      | 65. 2-Oxobutyric acid                                   |
| 31. 2-Propanol                                                   |                                                         |
| 32. Dimethylamine                                                |                                                         |
| 33. Uridine                                                      |                                                         |
| 34. 3-Methyl-2-oxovaleric acid                                   |                                                         |
| 35. 1,2-Propanediol                                              |                                                         |

| <b>Table S2:</b> Pooled human serum samples used in this study. |                                     |                          |
|-----------------------------------------------------------------|-------------------------------------|--------------------------|
| <b>Method</b>                                                   | <b>Solvent to serum ratio (v/v)</b> | <b>Number of samples</b> |
| Methanol Precipitation                                          | 1:1                                 | 4                        |
|                                                                 | 2:1                                 | 4                        |
|                                                                 | 3:1                                 | 4                        |
|                                                                 | 4:1                                 | 4                        |
| Acetonitrile Precipitation                                      | 1:1                                 | 4                        |
|                                                                 | 2:1                                 | 4                        |
|                                                                 | 3:1                                 | 4                        |
|                                                                 | 4:1                                 | 4                        |
| Ultrafiltration                                                 | -                                   | 2                        |

| <b>Table S3:</b> Concentration of the six volatile metabolites detected only ultrafiltered serum.                                                |                                                 |
|--------------------------------------------------------------------------------------------------------------------------------------------------|-------------------------------------------------|
| <b>Metabolite</b>                                                                                                                                | <b>Concentration (<math>\mu\text{M}</math>)</b> |
| Acetone                                                                                                                                          | 1.1 $\pm$ 0.3                                   |
| Ethanol                                                                                                                                          | 103.7 $\pm$ 2.4                                 |
| Dimethylamine                                                                                                                                    | 0.25 $\pm$ 0.1                                  |
| Methanol*                                                                                                                                        | 551 $\pm$ 26                                    |
| 2-Propanol                                                                                                                                       | 7.7 $\pm$ 1.2                                   |
| Urea                                                                                                                                             | 42.0 $\pm$ 5.0                                  |
| *Higher concentration value for methanol is due to the contribution from the filter membrane (see <i>Anal. Chem.</i> <b>2014</b> , 86:5433-5440) |                                                 |

**Table S4:** Metabolites detected in pooled human blood serum and their concentrations (in  $\mu\text{M}$ ) determined by NMR spectra obtained after protein precipitation using different proportions of methanol or acetonitrile solvent.

| Metabolite                   | Methanol to Serum ratio (v/v) |                 |                  | Acetonitrile to Serum ratio (v/v) |                   |                   |
|------------------------------|-------------------------------|-----------------|------------------|-----------------------------------|-------------------|-------------------|
|                              | 2:1                           | 3:1             | 4:1              | 2:1                               | 3:1               | 4:1               |
| 1-Methylhistidine            | 4.5 $\pm$ 0.1                 | 4.2 $\pm$ 0.0   | 4.4 $\pm$ 0.0    | 3.3 $\pm$ 0.1                     | 2.1 $\pm$ 0.1     | 2.0 $\pm$ 0.0     |
| 1,2-Propanediol <sup>S</sup> | 7.5 $\pm$ 0.1                 | 6.6 $\pm$ 0.0   | 6.0 $\pm$ 0.1    | 6.1 $\pm$ 0.1                     | 4.5 $\pm$ 0.1     | 3.3 $\pm$ 0.1     |
| 2-Hydroxybutyric acid        | 37.7 $\pm$ 0.4                | 37.4 $\pm$ 0.0  | 34.8 $\pm$ 0.6   | 36.4 $\pm$ 0.6                    | 36.1 $\pm$ 1.0    | 32.6 $\pm$ 0.3    |
| 2-Hydroxyisovaleric acid     | 13 $\pm$ 0.0                  | 12.7 $\pm$ 0.4  | 11.3 $\pm$ 0.1   | 11.9 $\pm$ 0.7                    | 11.1 $\pm$ 0.1    | 10.9 $\pm$ 0.1    |
| 2-Aminobutyric acid          | 16.0 $\pm$ 0.0                | 16.2 $\pm$ 0.3  | 16.1 $\pm$ 0.1   | 15.3 $\pm$ 0.1                    | 15.1 $\pm$ 0.1    | 12.5 $\pm$ 0.1    |
| 2-Propanol                   | NM                            | NM              | NM               | NM                                | NM                | NM                |
| 2-Oxoisocaproic acid         | 13.7 $\pm$ 0.1                | 13.4 $\pm$ 0.3  | 11.7 $\pm$ 1.0   | 13.7 $\pm$ 0.1                    | 13.4 $\pm$ 0.3    | 13.6 $\pm$ 0.0    |
| 2-Oxoisovaleric acid         | 2.1 $\pm$ 0.1                 | 2.0 $\pm$ 0.0   | 2.0 $\pm$ 0.0    | 2.1 $\pm$ 0.0                     | 2.2 $\pm$ 0.0     | 2.1 $\pm$ 0.0     |
| 3-Hydroxybutyric acid        | 89 $\pm$ 0.8                  | 82.2 $\pm$ 0.3  | 82.1 $\pm$ 0.1   | 89.0 $\pm$ 0.3                    | 85.7 $\pm$ 2.1    | 73.2 $\pm$ 0.6    |
| 3-Hydroxyisovaleric acid     | 2.0 $\pm$ 0.0                 | 2.2 $\pm$ 0.0   | 1.7 $\pm$ 0.1    | 1.8 $\pm$ 0.0                     | 1.5 $\pm$ 0.1     | 1.7 $\pm$ 0.1     |
| 3-Methylhistidine            | 5.0 $\pm$ 0.0                 | 5.0 $\pm$ 0.0   | 5.0 $\pm$ 0.0    | 5.1 $\pm$ 0.1                     | 2.4 $\pm$ 0.0     | 1.8 $\pm$ 0.0     |
| 3-Methyl-2-oxovaleric acid   | 9.6 $\pm$ 0.3                 | 10.1 $\pm$ 0.1  | 8.3 $\pm$ 0.1    | 11.1 $\pm$ 0.1                    | 10.6 $\pm$ 0.6    | 10.4 $\pm$ 0.3    |
| Acetic acid                  | 271.3 $\pm$ 0.1               | 269.0 $\pm$ 1.1 | 246.1 $\pm$ 0.1  | 271.0 $\pm$ 0.6                   | 270.7 $\pm$ 0.1   | 254.2 $\pm$ 2.8   |
| Acetone                      | NM                            | NM              | NM               | NM                                | NM                | NM                |
| Acetylcarnitine              | 4.0 $\pm$ 0.0                 | 4.0 $\pm$ 0.0   | 4.0 $\pm$ 0.0    | 4.0 $\pm$ 0.0                     | 4.0 $\pm$ 0.0     | 3.8 $\pm$ 0.0     |
| N-Acetylglycine              | 57.2 $\pm$ 1.9                | 59.0 $\pm$ 1.9  | 55.4 $\pm$ 0.6   | 50.9 $\pm$ 1.9                    | 46.4 $\pm$ 0.6    | 43.1 $\pm$ 0.1    |
| Alanine                      | 353.1 $\pm$ 5.8               | 342.4 $\pm$ 2.3 | 341.0 $\pm$ 1.4  | 335.3 $\pm$ 4.7                   | 270.0 $\pm$ 2.8   | 251.0 $\pm$ 1.4   |
| Arginine                     | 138.2 $\pm$ 0.3               | 138.7 $\pm$ 1.0 | 132.2 $\pm$ 0.3  | 136.2 $\pm$ 0.3                   | 120.7 $\pm$ 1.0   | 103.0 $\pm$ 1.4   |
| Asparagine                   | 44.4 $\pm$ 0.3                | 44.1 $\pm$ 0.1  | 38.7 $\pm$ 0.1   | 35.2 $\pm$ 0.8                    | 24.1 $\pm$ 0.1    | 20.3 $\pm$ 0.1    |
| Aspartic acid                | 35.6 $\pm$ 0.6                | 33.5 $\pm$ 0.7  | 28.9 $\pm$ 0.1   | 28.2 $\pm$ 0.3                    | 15.6 $\pm$ 0.3    | 11.9 $\pm$ 0.1    |
| Benzoic acid                 | 36.3 $\pm$ 0.1                | 36.2 $\pm$ 0.0  | 35.8 $\pm$ 0.3   | 35.9 $\pm$ 0.1                    | 34.2 $\pm$ 0.3    | 34.7 $\pm$ 0.4    |
| Betaine                      | 48.4 $\pm$ 0.3                | 49.5 $\pm$ 0.7  | 47.8 $\pm$ 0.3   | 48.8 $\pm$ 0.6                    | 44.2 $\pm$ 1.1    | 41.1 $\pm$ 0.1    |
| Carnitine                    | 35.0 $\pm$ 0.3                | 34.5 $\pm$ 0.7  | 32.2 $\pm$ 0.3   | 28.3 $\pm$ 0.4                    | 28.4 $\pm$ 1.1    | 26.7 $\pm$ 0.1    |
| Choline                      | 117.9 $\pm$ 0.1               | 116.2 $\pm$ 0.3 | 111.4 $\pm$ 0.3  | 113.5 $\pm$ 0.7                   | 114.0 $\pm$ 1.4   | 115.5 $\pm$ 0.7   |
| Citric acid                  | 18.6 $\pm$ 0.0                | 19.1 $\pm$ 0.1  | 18.7 $\pm$ 0.1   | 6.5 $\pm$ 0.1                     | 0                 | 0                 |
| Creatine                     | 28.4 $\pm$ 0.6                | 28.9 $\pm$ 0.1  | 27.3 $\pm$ 0.1   | 25.4 $\pm$ 0.3                    | 22.1 $\pm$ 0.1    | 18.4 $\pm$ 0.3    |
| Creatinine                   | 77.9 $\pm$ 0.7                | 76.2 $\pm$ 0.3  | 69.3 $\pm$ 0.1   | 76.1 $\pm$ 0.1                    | 74.6 $\pm$ 0.3    | 74.3 $\pm$ 0.1    |
| Dimethylamine                | NM                            | NM              | NM               | NM                                | NM                | NM                |
| Dimethylglycine              | 3.0 $\pm$ 0.0                 | 3.0 $\pm$ 0.0   | 2.8 $\pm$ 0.0    | 2.7 $\pm$ 0.1                     | 2.5 $\pm$ 0.1     | 2.4 $\pm$ 0.0     |
| Ethanol                      | NM                            | NM              | NM               | NM                                | NM                | NM                |
| Formic acid                  | 30.3 $\pm$ 1.8                | 27.1 $\pm$ 0.4  | 22.3 $\pm$ 0.1   | 17.5 $\pm$ 0.7                    | 17.1 $\pm$ 0.1    | 17.2 $\pm$ 0.0    |
| Fumaric acid                 | 0.6 $\pm$ 0.0                 | 0.6 $\pm$ 0.0   | 0.4 $\pm$ 0.0    | 0.2 $\pm$ 0.0                     | 0                 | 0                 |
| Glucose <sup>&amp;</sup>     | 3456 $\pm$ 90.5               | 3407 $\pm$ 1.4  | 3282.0 $\pm$ 2.8 | 3348.0 $\pm$ 11.3                 | 2941.0 $\pm$ 24.0 | 2650.0 $\pm$ 14.1 |
| Glutamic acid                | 257.1 $\pm$ 0.1               | 255.6 $\pm$ 0.6 | 237.0 $\pm$ 1.4  | 200.5 $\pm$ 0.1                   | 148.0 $\pm$ 4.8   | 101.0 $\pm$ 1.4   |
| Glutamine                    | 170.2 $\pm$ 3.1               | 173.3 $\pm$ 1.0 | 167.5 $\pm$ 0.7  | 167.5 $\pm$ 0.1                   | 116.5 $\pm$ 0.1   | 89.5 $\pm$ 0.1    |
| Glycerol                     | 184.9 $\pm$ 3.5               | 182.2 $\pm$ 0.3 | 165.7 $\pm$ 0.4  | 184.4 $\pm$ 0.3                   | 176.4 $\pm$ 9.5   | 165.0 $\pm$ 1.4   |
| Glycine                      | 407.8 $\pm$ 0.0               | 407.8 $\pm$ 0.0 | 381.0 $\pm$ 1.4  | 374.7 $\pm$ 1.3                   | 279.4 $\pm$ 3.7   | 228.3 $\pm$ 1.0   |
| Hippuric acid                | NM                            | NM              | NM               | NM                                | NM                | NM                |
| Histidine                    | 62.0 $\pm$ 2.3                | 62.9 $\pm$ 2.4  | 63.0 $\pm$ 0.8   | 63.0 $\pm$ 0.8                    | 47.7 $\pm$ 0.1    | 39.3 $\pm$ 2.4    |
| Hypoxanthine                 | 2.0 $\pm$ 0.0                 | 2.0 $\pm$ 0.0   | 2.0 $\pm$ 0.0    | 2.0 $\pm$ 0.3                     | 2.1 $\pm$ 0.1     | 2.2 $\pm$ 0.0     |

|                      |               |               |               |               |               |               |
|----------------------|---------------|---------------|---------------|---------------|---------------|---------------|
| Isobutyric acid      | 5.9 ± 0.4     | 5.9 ± 0.4     | 5.6 ± 0.0     | 5.7 ± 0.1     | 5.1 ± 0.4     | 5.5 ± 0.1     |
| Isoleucine           | 68.6 ± 0.0    | 62.4 ± 2.3    | 64.1 ± 0.1    | 63.2 ± 2.0    | 55.5 ± 0.1    | 47.0 ± 1.4    |
| Isovaleric acid      | 10.2 ± 0.3    | 10.8 ± 0.0    | 11.2 ± 0.6    | 9.9 ± 0.4     | 9.2 ± 0.3     | 9.5 ± 0.1     |
| Lactic acid          | 2870.6 ± 15.0 | 2668.0 ± 50.9 | 2452.0 ± 17.0 | 2350.0 ± 70.7 | 1826.0 ± 48.0 | 1747.0 ± 38.2 |
| Leucine              | 118.9 ± 2.4   | 117.7 ± 0.1   | 116.0 ± 0.0   | 119.6 ± 1.4   | 108.4 ± 0.3   | 101.0 ± 0.6   |
| Lysine               | 119.8 ± 0.0   | 124.6 ± 2.0   | 121.5 ± 0.1   | 99.5 ± 3.5    | 53.5 ± 0.4    | 36.6 ± 0.6    |
| Mannose <sup>@</sup> | 64.0 ± 0.0    | 64.0 ± 0.0    | 62.5 ± 0.7    | 57.8 ± 1.7    | 51.1 ± 0.1    | 41.5 ± 0.4    |
| Methanol             | NM            | NM            | NM            | NM            | NM            | NM            |
| Methionine           | 27.1 ± 0.4    | 26.9 ± 0.1    | 25.4 ± 0.3    | 25.7 ± 0.4    | 22.5 ± 0.1    | 17.7 ± 0.1    |
| Myoinositol          | 22.4 ± 0.0    | 21.8 ± 0.0    | 18.9 ± 0.7    | 17.2 ± 0.6    | 12.3 ± 1.5    | 9.5 ± 0.4     |
| Ornithine            | 32.6 ± 0.0    | 32.5 ± 0.1    | 32.2 ± 0.0    | 27.8 ± 0.3    | 18.0 ± 0.0    | 18.0 ± 0.0    |
| Phenylalanine        | 133.3 ± 0.1   | 134 ± 0.0     | 120.9 ± 0.4   | 126.3 ± 0.1   | 120.7 ± 3.8   | 114.7 ± 0.4   |
| Proline              | 231.9 ± 2.1   | 230 ± 0.0     | 211.5 ± 0.7   | 211.8 ± 0.3   | 209.0 ± 4.2   | 189.0 ± 1.4   |
| Pyroglutamic acid    | 85.4 ± 1.7    | 87 ± 0.6      | 85.5 ± 0.7    | 84.5 ± 0.7    | 83.5 ± 0.7    | 74.5 ± 0.7    |
| Sarcosine            | 1.6 ± 0.0     | 1.6 ± 0.0     | 1.6 ± 0.0     | 1.6 ± 0.0     | 1.4 ± 0.0     | 1.0 ± 0.0     |
| Serine               | 133.6 ± 0.0   | 129.6 ± 0.6   | 118.0 ± 0.0   | 119.8 ± 0.3   | 109.5 ± 0.0   | 71.0 ± 1.4    |
| Succinic acid        | 18.9 ± 2.4    | 18.8 ± 0.6    | 16.3 ± 0.1    | 12.8 ± 0.3    | 7.7 ± 0.7     | 3.2 ± 0.3     |
| Sucrose              | NM            | NM            | NM            | NM            | NM            | NM            |
| Threonine            | 160.4 ± 1.7   | 157.2 ± 0.8   | 145.0 ± 1.4   | 126.3 ± 0.1   | 94.8 ± 0.6    | 77.3 ± 0.1    |
| Tryptophan           | 47.5 ± 0.7    | 47.8 ± 0.3    | 47.9 ± 0.1    | 48.4 ± 0.3    | 48.4 ± 0.3    | 48.3 ± 0.1    |
| Tyrosine             | 70.3 ± 0.7    | 71.1 ± 1.0    | 62.2 ± 0.3    | 68.9 ± 0.1    | 61.8 ± 1.4    | 56.5 ± 0.4    |
| Urea                 | NM            | NM            | NM            | NM            | NM            | NM            |
| Uridine              | 3.3 ± 0.1     | 3.3 ± 0.1     | 3.0 ± 0.0     | 3.4 ± 0.0     | 3.4 ± 0.0     | 3.5 ± 0.1     |
| Valine               | 153.8 ± 2.0   | 151.9 ± 0.4   | 151.8 ± 0.3   | 151.9 ± 0.1   | 135.2 ± 0.3   | 121.7 ± 0.4   |
| Xanthine             | 4.3 ± 0.4     | 4.6 ± 0.3     | 4.6 ± 0.0     | 4.2 ± 0.0     | 2.7 ± 0.1     | 1.9 ± 0.1     |

NM-Detected, but not measured since the signal intensity was too weak or not detected in protein precipitated serum samples. Error is expressed as standard deviation. <sup>§</sup>1,2-propanediol NMR peak intensity is attenuated due to sample drying after protein precipitation and hence the shown values are anticipated to be lower than actual concentration in blood. <sup>&</sup>Sum of  $\alpha$ - and  $\beta$ -Glucose. <sup>@</sup> Sum of  $\alpha$ - and  $\beta$ -Mannose. See Figures 1 and Figure 2.

**Table S5:** Attenuation of metabolite concentrations (in %) relative to methanol or acetonitrile precipitated serum (2:1 v/v) determined using high resolution <sup>1</sup>H 1D NMR spectroscopy at 800 MHz.

| Metabolite                 | Relative to 2:1 MeOH |          |          | Relative to 2:1 ACN |         |
|----------------------------|----------------------|----------|----------|---------------------|---------|
|                            | 2:1 ACN              | 3:1 MeOH | 4:1 MeOH | 3:1 ACN             | 4:1 ACN |
| 1-Methylhistidine          | 26.7                 | 6.7      | 2.2      | 36.4                | 39.4    |
| 2-Hydroxybutyric acid      | 3.4                  | 0.8      | 7.7      | 0.8                 | 10.4    |
| 2-Hydroxyisovaleric acid   | 8.5                  | 2.3      | 13.1     | 6.7                 | 8.4     |
| 2-Aminobutyric acid        | 4.3                  | -1.3     | -0.6     | 2.3                 | 18.3    |
| 2-Propanol                 | NM                   | NM       | NM       | NM                  | NM      |
| 2-Oxoisocaproic acid       | 0                    | 2.2      | 14.6     | 2.2                 | 0.7     |
| 2-Oxoisovaleric acid       | 0.7                  | 2.2      | 2.2      | -6.5                | -2.2    |
| 3-Hydroxybutyric acid      | 0                    | 7.6      | 7.8      | 3.7                 | 17.8    |
| 3-Hydroxyisovaleric acid   | 10.0                 | -10.0    | 15.0     | 16.7                | 5.6     |
| 3-Methylhistidine          | -2.0                 | 0        | 0        | 52.9                | 64.7    |
| 3-Methyl-2-oxovaleric acid | -15.6                | -5.2     | 13.5     | 4.5                 | 6.3     |
| Acetic acid                | 0.1                  | 0.9      | 9.3      | 0.0                 | 6.2     |
| Acetone                    | NM                   | NM       | NM       | NM                  | NM      |
| Acetylcarnitine            | 0.0                  | 0.0      | 0.0      | 0.0                 | 5.0     |
| N-Acetylglycine            | 11.0                 | -3.1     | 3.1      | 8.8                 | 15.2    |
| Alanine                    | 5.0                  | 3.0      | 3.4      | 19.5                | 25.1    |
| Arginine                   | 1.4                  | -0.4     | 4.3      | 11.4                | 24.4    |
| Asparagine                 | 20.7                 | 0.8      | 12.8     | 31.5                | 42.3    |
| Aspartic acid              | 20.8                 | 5.9      | 18.8     | 44.7                | 57.8    |
| Benzoic acid               | 1.1                  | 0.3      | 1.4      | 4.7                 | 3.3     |
| Betaine                    | -0.8                 | -2.3     | 1.2      | 9.4                 | 15.8    |
| Carnitine                  | 19.1                 | 1.4      | 8.0      | -0.4                | 5.7     |
| Choline                    | 3.7                  | 1.4      | 5.5      | -0.4                | -1.8    |
| Citric acid                | 65.1                 | -2.7     | -0.5     | 100                 | 100     |
| Creatine                   | 10.6                 | -1.8     | 3.9      | 13.0                | 27.6    |
| Creatinine                 | 2.3                  | 2.2      | 11.0     | 2.0                 | 2.4     |
| Dimethylamine              | NM                   | NM       | NM       | NM                  | NM      |
| Ethanol                    | NM                   | NM       | NM       | NM                  | NM      |
| Formic acid                | 42.2                 | 10.6     | 26.4     | 2.3                 | 1.7     |
| Fumaric acid               | 66.7                 | 0        | 33.3     | 100.0               | 100     |
| Glucose <sup>&amp;</sup>   | 3.1                  | 1.4      | 5.0      | 12.2                | 20.8    |
| Glutamic acid              | 22.0                 | 0.6      | 7.8      | 26.2                | 49.6    |
| Glutamine                  | 1.6                  | -1.8     | 1.6      | 30.4                | 46.6    |
| Glycerol                   | 0.3                  | 1.5      | 10.4     | 4.3                 | 10.5    |
| Glycine                    | 8.1                  | 0        | 6.6      | 25.4                | 39.1    |
| Hippuric acid              | NM                   | NM       | NM       | NM                  | NM      |
| Histidine                  | -1.6                 | -1.5     | -1.6     | 24.3                | 37.6    |

|                      |      |      |      |      |       |
|----------------------|------|------|------|------|-------|
| Hypoxanthine         | 0    | 0    | 0    | -5.0 | -10.0 |
| Isobutyric acid      | 3.4  | 0    | 5.1  | 10.5 | 3.5   |
| Isoleucine           | 7.9  | 9.0  | 6.6  | 12.2 | 25.6  |
| Isovaleric acid      | 2.9  | -5.8 | -9.8 | 7.7  | 4.0   |
| Lactic acid          | 18.1 | 7.1  | 14.6 | 22.3 | 25.7  |
| Leucine              | -0.6 | 1.0  | 2.4  | 9.4  | 15.6  |
| Lysine               | 16.9 | -4.0 | -1.4 | 46.2 | 63.2  |
| Mannose <sup>@</sup> | 9.7  | 0    | 2.3  | 11.6 | 28.2  |
| Methanol             | NM   | NM   | NM   | NM   | NM    |
| Methionine           | 5.2  | 0.7  | 6.3  | 12.5 | 31.1  |
| Myoinositol          | 23.2 | 2.7  | 15.6 | 28.5 | 44.8  |
| N,N-Dimethylglycine  | 10   | 0    | 6.7  | 7.4  | 11.1  |
| Ornithine            | 14.7 | 0.3  | 1.2  | 35.3 | 35.3  |
| Phenylalanine        | 5.3  | -0.5 | 9.3  | 4.4  | 9.2   |
| Proline              | 8.7  | 0.8  | 8.8  | 1.3  | 10.8  |
| Pyroglutamic acid    | 1.1  | -1.9 | -0.1 | 1.2  | 11.8  |
| Sarcosine            | 0    | 0    | 0    | 12.5 | 37.5  |
| Serine               | 10.3 | 3.0  | 11.7 | 8.6  | 40.7  |
| Succinic acid        | 32.3 | 0.5  | 13.8 | 39.8 | 75.0  |
| Sucrose              | NM   | NM   | NM   | NM   | NM    |
| Threonine            | 21.3 | 2.0  | 9.6  | 24.9 | 38.8  |
| Tryptophan           | -1.9 | -0.6 | -0.8 | 0    | 0.2   |
| Tyrosine             | 2.0  | -1.1 | 11.5 | 10.3 | 18.0  |
| Urea                 | NM   | NM   | NM   | NM   | NM    |
| Uridine              | -3.0 | 0    | 9.1  | 0    | -2.9  |
| Valine               | 1.2  | 1.2  | 1.3  | 11.0 | 19.9  |
| Xanthine             | 2.3  | -7.0 | -7.0 | 35.7 | 54.8  |

NM-Not measured; positive value indicates decrease and negative value indicates increase; <sup>&</sup>Sum of  $\alpha$ - and  $\beta$ -Glucose; <sup>@</sup>Sum of  $\alpha$ - and  $\beta$ -Mannose.

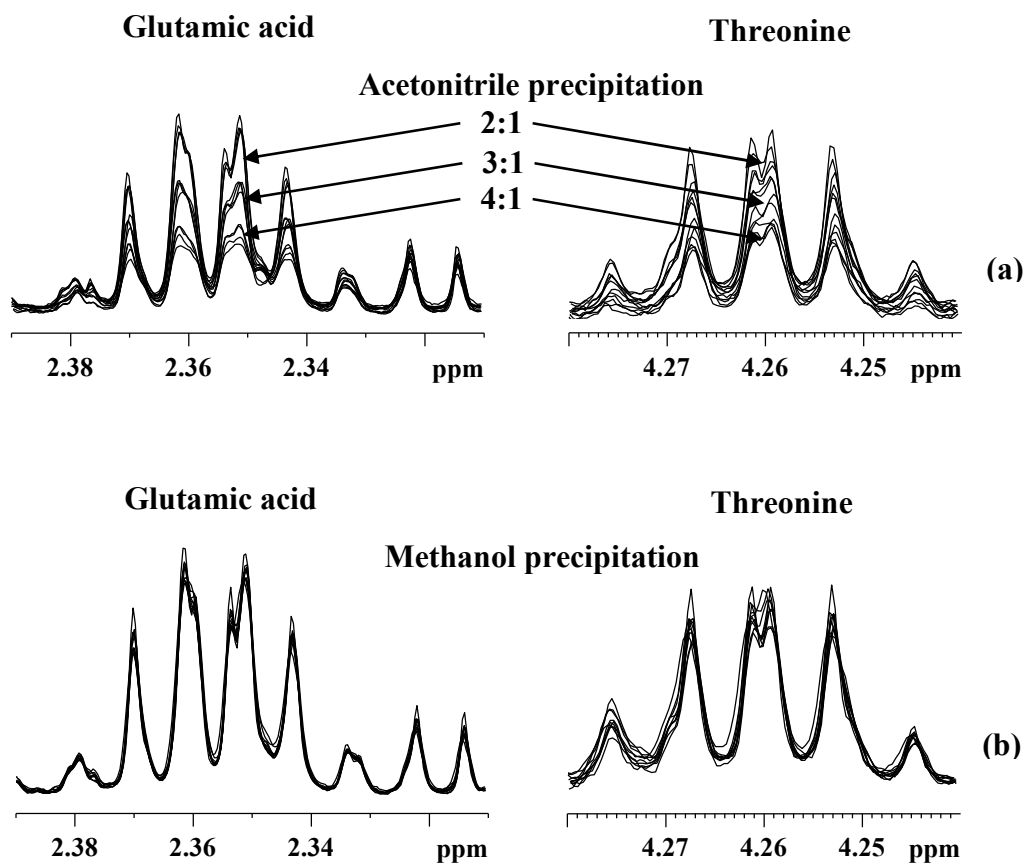

**Figure S1:** (a) Examples of glutamic acid and threonine NMR peaks, which depict typical reductions in peak intensity when the proportion of acetonitrile is increased from 2:1 to 4:1 for serum protein precipitation; (b) Peaks for the same metabolites indicate that methanol performs much better over a wide range of its concentration. The ratios 2:1, 3:1 and 4:1 indicate solvent to serum ratios used for protein precipitation.



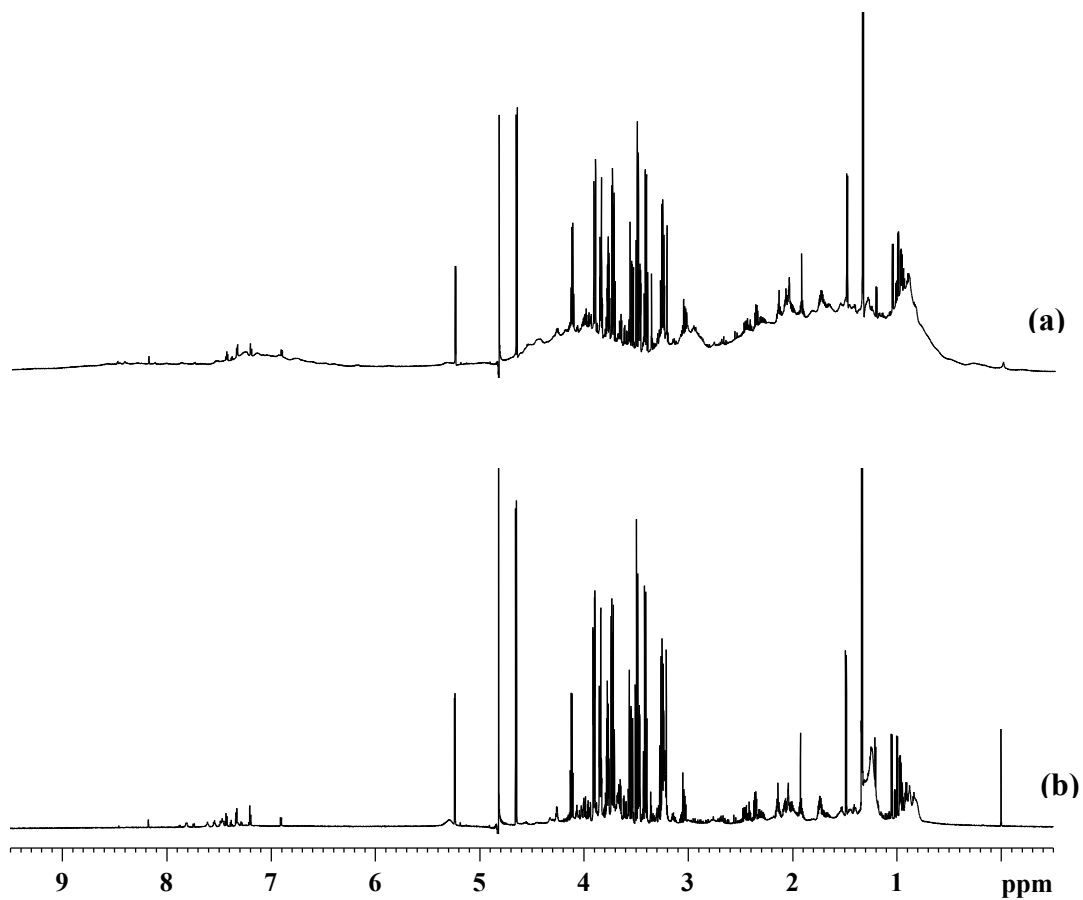

**Figure S2:** NMR spectra of pooled human serum obtained using the one-pulse sequence with water presaturation after protein precipitation using a methanol to serum ratio of (a) 1:1 and (b) 2:1. Note, higher level of protein background is observed in (a).

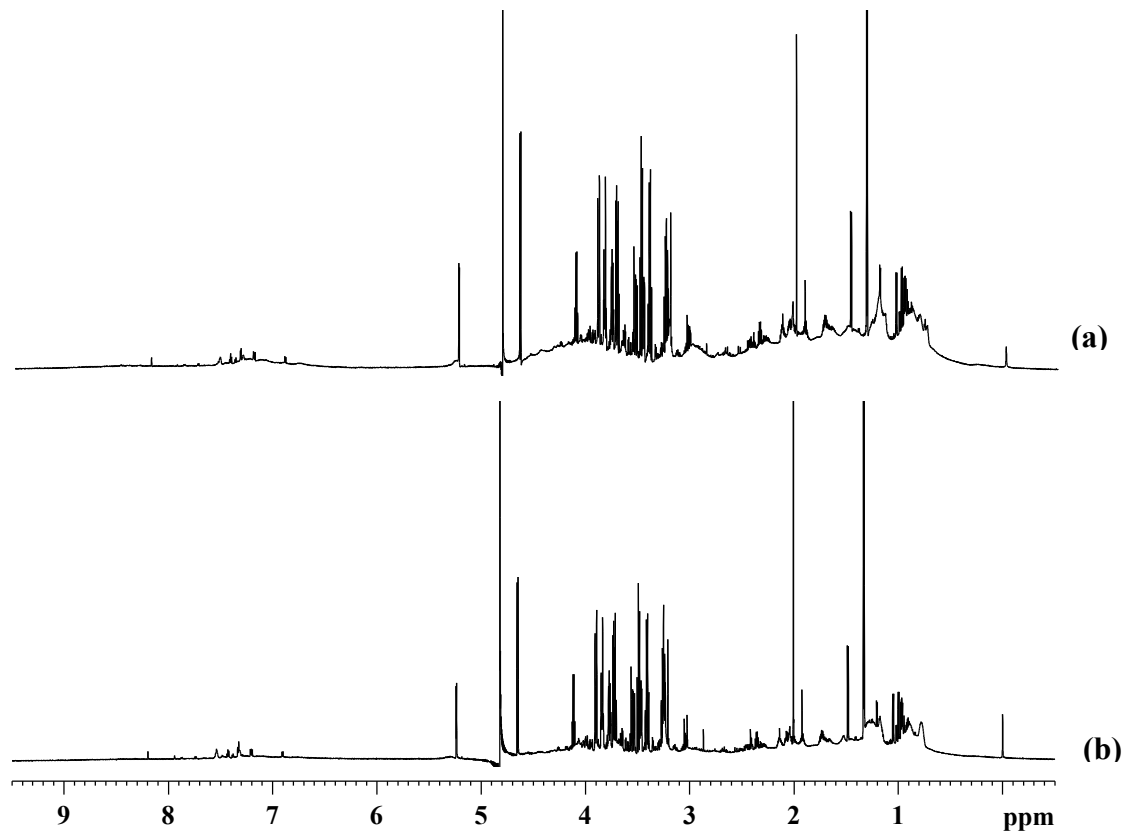

**Figure S3:** NMR spectra of pooled human serum obtained using the one-pulse sequence with water presaturation after protein precipitation using an acetonitrile to serum ratio of (a) 1:1 and (b) 2:1. Note, higher level of protein background is observed in (a).
